# Supplementary material for: Transcriptome Analyses Revealed Adaptive-Responses in Livers of Mice Treated With Hua-Feng-Dan and Its “Guide Drug” Yaomu
Source: Research Square preprint supplement (doi:10.21203/rs.3.rs-143356/v1), 2021-01-13
Supplement: Supplementary file 1 [file e154b7e9b0ac2fc6b8c5fd06.xlsx]

## Sheet: Sheet1
Gene	GWEIGHT	YM-H	YM-L	HFD
		1	1	1
Vwa1	1	14.7	0	47.6
Zbtb16	1	3.57	0	8.24
Plekhf1	1	2.28	0	4.73
Fbf1	1	1.85	0	3.76
Hsd17b6	1	1.71	0	3.16
Zfp184	1	21.9	0	34.7
Trib3	1	2.69	0	4.26
N4bp2l1	1	1.74	0	2.89
Abcg8	1	1.45	0	2.37
Cyp26c1	1	31.5	16.8	47
Filip1	1	35.7	10.8	39
St3gal5	1	1.78	0	2.42
Mcc	1	1.49	0	2.09
Bcl6	1	2.03	0	2.47
Apoa1	1	1.33	0	1.69
Atoh8	1	2	0	2.16
Fbxo32	1	1.99	0	2.12
Zfp750	1	1.93	0	2.19
Pnpla5	1	4.12	0	4.75
Slc30a3	1	11.9	0	13.7
Slc25a33	1	1.52	0	1.75
Fbxo21	1	1.53	0	1.76
Ipmk	1	1.4	0	1.62
Arhgef3	1	1.43	0	1.67
Hoxb5	1	33.1	0	21.9
Pcdhb16	1	25.8	0	17.8
Ccnjl	1	18.9	0	16.3
Atxn1	1	1.88	0	1.54
Hey2	1	21.3	0	20.7
Calcoco1	1	1.44	0	1.44
Serpinh1	1	1.44	0	1.42
Vegfc	1	1.89	0	1.74
Amotl2	1	1.62	0	1.49
Cyp4a32	1	0	-1.89	1.7
Serpina6	1	0	-1.63	1.56
Gsta2	1	0	-1.85	1.83
Colec11	1	0	-1.41	1.38
Enpp3	1	0	-1.33	1.29
Cdc14b	1	0	-1.38	1.49
Cd209a	1	0	118	10.7	CD209 (Cluster of Differentiation 209) is a protein coding gene
Sh3pxd2b	1	0	28.6	8.12	H3PXD2B (SH3 And PX Domains 2B) is a Protein Coding gene.
Rasgrp4	1	0	12.9	5.24	RASGRP4 (RAS Guanyl Releasing Protein 4) is a Protein Coding gene.
Atf3	1	0	12.8	5.1	ATF3 (Activating Transcription Factor 3) is a Protein Coding gene.
Thbs1	1	0	10.5	4.03	TThbs1 (Thrombospondin 1) is a Protein Coding gene.
Gpr35	1	0	9.58	3.54	GPR35 (G Protein-Coupled Receptor 35) is a Protein Coding gene.
Gpnmb	1	0	47.2	20.3	GPNMB (Glycoprotein Nmb) is a Protein Coding gene.
Stx11	1	0	10.5	4.73	STX11 (Syntaxin 11) is a Protein Coding gene.
Irf8	1	0	4.22	1.9	IRF8 (Interferon Regulatory Factor 8) is a Protein Coding gene.
Bcl2a1d	1	27.6	108	64.7	BCL2A1 (BCL2 Related Protein A1) is a Protein Coding gene
Egr3	1	0	39.9	20.1	EGR3 (Early Growth Response 3) is a Protein Coding gene.
Iqgap3	1	0	29.6	14.9	IQGAP3 (IQ Motif Containing GTPase Activating Protein 3) is a Protein Coding gene
Gramd1b	1	0	5.81	3.06	GRAMD1B (GRAM Domain Containing 1B) is a Protein Coding gene.
Capg	1	0	5.61	3.03	CAPG (Capping Actin Protein, Gelsolin Like) is a Protein Coding gene.
Svep1	1	0	37.7	21.9	SVEP1 (Sushi, Von Willebrand Factor Type A, EGF And Pentraxin Domain Containing 1)
Cdc25b	1	0	5.84	3.4	CDC25B (Cell Division Cycle 25B) is a Protein Coding gene
Cln6	1	0	5.69	3.33	CLN6 (CLN6 Transmembrane ER Protein) is a Protein Coding gene.
Arhgap9	1	0	4.83	2.89	ARHGAP9 (Rho GTPase Activating Protein 9) is a Protein Coding gene
Sybu	1	0	12.4	7	SYBU (Syntabulin) is a Protein Coding gene.
Amz1	1	0	6.14	3.41	AMZ1 (Archaelysin Family Metallopeptidase 1) is a Protein Coding gene.
Cd300lb	1	0	5.42	3.02	CD300LB (CD300 Molecule Like Family Member B) is a Protein Coding gene.
Siglecg	1	0	32.6	20.1	SIGLECG (Sialic acid-binding immunoglobulin-type lectins)
Map3k6	1	0	12.7	8.01	MAP3K6 (mitogen-activated protein kinase kinase kinase 6) is a protein-coding gene.
Gdpd5	1	0	14.8	9.57	GDPD5 (Glycerophosphodiester Phosphodiesterase Domain Containing 5) is a Protein Coding gene.
Klrg1	1	0	32.6	21.5	KLRG1 (Killer Cell Lectin Like Receptor G1) is a Protein Coding gene.
Cd34	1	0	7.44	4.97	CD34 (CD34 Molecule) is a Protein Coding gene.
Ncapd2	1	0	4.16	2.79	NCAPD2 (Non-SMC Condensin I Complex Subunit D2) is a Protein Coding gene.
Itga2	1	0	10	7.33	ITGA2 (integrin, alpha 2 (CD49B, alpha 2 subunit of VLA-2 receptor)) is a protein-coding gene.
Lepr	1	0	3.5	2.56	LEPR (Leptin Receptor) is a Protein Coding gene
Ralgds	1	0	3.83	2.75	RALGDS (Ral Guanine Nucleotide Dissociation Stimulator) is a Protein Coding gene
Slc10a6	1	0	17.8	12.3	SLC10A6 (Solute Carrier Family 10 Member 6) is a Protein Coding gene.
Tcf3	1	0	2.29	1.61	TCF3 (Transcription Factor 3) is a Protein Coding gene
Dagla	1	0	7.2	5.87	DAGLA (diacylglycerol lipase, alpha) is a protein-coding gene.
Matn2	1	0	3.78	3.1	MATN2 (Matrilin 2) is a Protein Coding gene.
Lcn2	1	0	19.1	15.4	LCN2 (Lipocalin 2) is a Protein Coding gene.
Tcof1	1	0	2.27	1.83	TCOF1 (Treacle Ribosome Biogenesis Factor 1) is a Protein Coding gene.
Tspan32	1	0	6.75	5.09	TCF3 (Transcription Factor 3) is a Protein Coding gene.
Tlr13	1	0	3.1	2.34	TLR13 (Toll-like receptors 13) is a protein coding gene
Ly6d	1	0	4.76	3.64	LY6D (Lymphocyte Antigen 6 Family Member D) is a Protein Coding gene.
Ifi27l2b	1	0	3.07	2.35	IFI27L2B (interferon, alpha-inducible protein 27 like 2B)
Il6ra	1	0	2.77	2.16	IL6R (Interleukin 6 Receptor) is a Protein Coding gene
Sez6l2	1	0	19.8	18.4	SEZ6L2 (Seizure Related 6 Homolog Like 2) is a Protein Coding gene.
Dgkh	1	0	3.4	3.17	DGKH (Diacylglycerol Kinase Eta) is a Protein Coding gene.
Egr1	1	0	7.26	6.8	EGR1 (Early Growth Response 1) is a Protein Coding gene.
Fignl1	1	0	3.59	3.36	FIGNL1 (Fidgetin Like 1) is a Protein Coding gene.
Spata6	1	0	2.75	2.53	SPATA6 (Spermatogenesis Associated 6) is a Protein Coding gene.
Nab2	1	0	2.52	2.32	NAB2 (NGFI-A Binding Protein 2) is a Protein Coding gene
Sema4b	1	0	2.81	2.56	SEMA4B (Semaphorin 4B) is a Protein Coding gene.
Sppl3	1	0	1.56	1.42	SEMA4B (Semaphorin 4B) is a Protein Coding gene
Myadm	1	0	1.78	1.61	MYADM (Myeloid Associated Differentiation Marker) is a Protein Coding gene.
Cd200r4	1	0	7.4	6.36	CD200R4 (CD200 receptor 4) is a protein coding gene
Pou2af1	1	0	6.12	5.28	POU2AF1 (POU Class 2 Homeobox Associating Factor 1)
Traf3ip2	1	0	3.03	2.62	TRAF3IP2 (TRAF3 Interacting Protein 2) is a Protein Coding gene.
Sipa1l3	1	0	2.3	1.99	SIPA1L3 (Signal Induced Proliferation Associated 1 Like 3) is a Protein Coding gene
Lpl	1	0	2.2	1.91	LPL (Lipoprotein Lipase) is a Protein Coding gene.
Cd79a	1	0	4.57	3.88	CD79A (Cluster of Differentiation 79A) is a protein coding gene.
Ccnd1	1	0	2.13	1.81	CCND1 (cyclin D1) is a protein-coding gene.
Ugt1a7c	1	0	39.2	34.3	UGT1A7C (UDP glucuronosyltransferase 1 family, polypeptide A7C).
Col6a2	1	0	3.82	3.36	COL6A2 (collagen, type VI, alpha 2) is a protein-coding gene.
Sowahb	1	0	2.04	1.8	SOWAHB (Sosondowah Ankyrin Repeat Domain Family Member B) is a Protein Coding gene.
Caskin2	1	0	1.95	1.72	CASKIN2 (CASK Interacting Protein 2) is a Protein Coding gene.
Cyp4f16	1	0	2.48	2.21	CYP4F16 (cytochrome P450, family 4, subfamily f, polypeptide 16)
Nrg4	1	0	2.56	2.3	NRG4 (Neuregulin 4) is a Protein Coding gene.
Scand1	1	0	1.76	1.58	SCAND1 (SCAN Domain Containing 1) is a Protein Coding gene.
Steap1	1	0	15.6	17.7	STEAP1 (STEAP Family Member 1) is a Protein Coding gene.
Vcam1	1	0	2.13	2.41	VCAM1 (Vascular Cell Adhesion Molecule 1) is a Protein Coding gene.
Rcor3	1	0	2.29	2.61	RCOR3 (REST Corepressor 3) is a Protein Coding gene.
Ank3	1	0	1.75	2.04	ANK3 (Ankyrin 3) is a Protein Coding gene.
Spag5	1	0	3.5	3.84	SPAG5 (Sperm Associated Antigen 5) is a Protein Coding gene.
Mfsd7c	1	0	2.7	2.96	MFSD7C (Major facilitator superfamily domain containing 7C ) is a protein coding gene.
Coro7	1	0	1.9	2.08	CORO7 (Coronin 7) is a Protein Coding gene.
Adrb3	1	0	2.05	2.26	ADRB3 (Adrenoceptor Beta 3) is a Protein Coding gene.
Csnk1e	1	0	1.87	2.06	CSNK1E (Casein Kinase 1 Epsilon) is a Protein Coding gene.
Timp1	1	0	36.2	40.6	TIMP1 (TIMP Metallopeptidase Inhibitor 1) is a Protein Coding gene.
Klf13	1	0	1.54	1.73	KLF13 (Kruppel Like Factor 13) is a Protein Coding gene.
Btg2	1	0	2.59	2.88	BTG2 (BTG Anti-Proliferation Factor 2) is a Protein Coding gene.
Mfsd10	1	0	2.01	2.23	MFSD10 (Major Facilitator Superfamily Domain Containing 10) is a Protein Coding gene.
Col5a1	1	0	1.92	2.13	COL5A1 (Collagen Type V Alpha 1 Chain) is a Protein Coding gene.
Lpar1	1	0	2.57	2.78	LPAR1 (Lysophosphatidic Acid Receptor 1) is a Protein Coding gene.
Ccdc21	1	0	2.19	2.37	CCDC21 (Coiled-Coil Domain Containing 21) is a Protein Coding gene.
Rbp1	1	0	1.91	2.06	RBP1 (Retinol Binding Protein 1) is a Protein Coding gene.
Spata2l	1	0	1.66	1.79	SPATA2L (Spermatogenesis Associated 2 Like) is a Protein Coding gene.
Fnip2	1	0	1.79	1.95	FNIP2 (Folliculin Interacting Protein 2) is a Protein Coding gene
Sema6b	1	0	2.09	2.23	SEMA6B (Semaphorin 6B) is a Protein Coding gene.
Tet3	1	0	1.59	1.7	TET3 (Tet Methylcytosine Dioxygenase 3) is a Protein Coding gene.
Zfp821	1	0	2.14	2.3	ZNF821 (Zinc Finger Protein 821) is a Protein Coding gene.
Sfswap	1	0	1.51	1.62	SFSWAP (Splicing Factor SWAP) is a Protein Coding gene.
Mmp12	1	0	45.4	44.7	MMP12 (Matrix Metallopeptidase 12) is a Protein Coding gene.
Bcl2a1a	1	0	12.6	12.4	BCL2A1 (BCL2 Related Protein A1) is a Protein Coding gene.
Arhgef4	1	0	16.5	16.3	ARHGEF4 (Rho Guanine Nucleotide Exchange Factor 4) is a Protein Coding gene.
Trem2	1	0	3.84	3.82	TREM2 (triggering receptor expressed on myeloid cells 2) is a protein-coding gene.
Taok3	1	0	1.51	1.5	TAOK3 (TAO kinase 3) is a protein-coding gene.
Pck2	1	0	1.96	1.96	PCK2 (Phosphoenolpyruvate Carboxykinase 2, Mitochondrial) is a Protein Coding gene.
Hes1	1	0	3.12	3.01	HES1 (Hes Family BHLH Transcription Factor 1) is a Protein Coding gene.
Cd63	1	0	2.11	2.03	CD63 (cluster of differentiation 63) is a protein coding gene.
Klf16	1	0	2.47	2.39	KLF16 (Kruppel-like factor 16) is a protein-coding gene.
Man2b2	1	0	1.56	1.51	MAN2B2 (Mannosidase Alpha Class 2B Member 2) is a Protein Coding gene.
Itgb3	1	0	2.69	2.75	ITGB3 (Integrin Subunit Beta 3) is a Protein Coding gene.
Tbxas1	1	0	2.38	2.43	TBXAS1 (Thromboxane A Synthase 1) is a Protein Coding gene.
Col6a3	1	0	1.99	2.04	COL6A3 (Collagen Type VI Alpha 3 Chain) is a Protein Coding gene.
Adora1	1	0	1.83	1.86	ADORA1 (adenosine A1 receptor) is a protein-coding gene.
Samd4	1	0	2.7	2.75	SAMD4A (Sterile Alpha Motif Domain Containing 4A) is a Protein Coding gene.
B4galnt1	1	0	1.57	1.6	B4GALNT1 (Beta-1,4 N-acetylgalactosaminyltransferase 1)
Phf21a	1	0	1.68	1.71	PHF21A (PHD Finger Protein 21A) is a Protein Coding gene.
Midn	1	0	2	2.02	MIDN (Midnolin) is a Protein Coding gene.
Zkscan6	1	0	1.95	2.04	ZKCAN6 (zinc finger with KRAB and SCAN domains 6) is a protein coding gene
Serpinb6b	1	0	1.88	1.97	SERPINB3 (Serpin Family B Member 3) is a Protein Coding gene.
Pcolce	1	0	1.92	2	PCOLCE (Procollagen C-Endopeptidase Enhancer) is a Protein Coding gene.
Scarb1	1	0	1.41	1.47	SCRB1 (Scavenger receptor class B type 1 (SRB1)).
Sirpb1a	1	27.6	41.4	21.5	SIRPB1A (Signal-regulatory protein beta 1A) is a protein coding gene.
Scn8a	1	9.47	18.7	7.93	SCN8A (Sodium channel, voltage gated, type VIII, alpha subunit) is a protein coding gene.
Bhlhe40	1	1.77	3.36	1.66	BHLHE40 (basic helix-loop-helix family, member e40) is a protein-coding gene.
Col9a3	1	15.6	25.8	19.7	COL9A3 (Collagen Type IX Alpha 3 Chain) is a Protein Coding gene
Clmp	1	2.85	4.37	3.48	CLMP (CXADR Like Membrane Protein) is a Protein Coding gene.
Ier2	1	1.77	2.72	2.16	IER2 (Immediate Early Response 2) is a Protein Coding gene
Fgf2	1	3.18	3.86	3.68	FGF2 (Fibroblast Growth Factor 2) is a Protein Coding gene.
Epha2	1	2.02	2.57	2.32	EPHA2 (EPH Receptor A2) is a Protein Coding gene.
Col1a1	1	2.37	3.08	2.38	COL1A1 (Collagen, type I, alpha 1) is a protein coding gene.
Sipa1	1	1.57	2.2	1.82	SIPA1 (Signal-Induced Proliferation-Associated 1) is a Protein Coding gene.
Baiap3	1	15.6	25.6	27.1	BAIAP3 (BAI1-associated protein 3) is a protein coding gene.
Cd8a	1	3.7	3.85	4.47	CD8a (cluster of differentiation 8a) is a protein vcoding gene.
Tes3-ps	1	2.89	3.11	3.59	TES3-PS (testis derived transcript 3) is a protein coding gene.
Klf10	1	2.37	2.33	3	KLF10 (Kruppel Like Factor 10) is a Protein Coding gene.
Lyve1	1	2.09	2.06	2.63	LYVE1 (Lymphatic vessel endothelial hyaluronan receptor 1).
Krba1	1	1.74	1.94	2.05	KRBA1 (KRAB-A Domain Containing 1) is a Protein Coding gene.
Col3a1	1	1.63	1.86	1.97	COL3A1 ( collagen type III 1) is a protein coding gene.
Irf2	1	1.49	1.64	1.68	IRF2(interferon regulatory factor 2) is a protein coding gene.
Smg9	1	1.67	1.71	1.82	SMG9 (SMG9 Nonsense Mediated MRNA Decay Factor) is a Protein Coding gene.
Nr1d1	1	4.26	4.53	2.71	NR1D1 (Nuclear Receptor Subfamily 1 Group D Member 1) is a Protein Coding gene.
Dpep1	1	28.3	24.1	21.8	DPEP1 (Dipeptidase 1) is a Protein Coding gene.
Hr	1	12.3	11.2	9.01	HR (HR Lysine Demethylase And Nuclear Receptor Corepressor) is a Protein Coding gene.
Nr1d2	1	2.32	2.34	1.82	NR1D2 (nuclear receptor subfamily 1, group D, member 2) is a protein coding gene
Setmar	1	2.09	2.1	1.97	SETMAR (SET Domain And Mariner Transposase Fusion Gene) is a Protein Coding gene.
Arl8a	1	1.51	1.62	1.43	ARL8A (ADP Ribosylation Factor Like GTPase 8A) is a Protein Coding gene.
Mthfd2l	1	2.22	1.72	1.85	MTHFD2L (Methylenetetrahydrofolate Dehydrogenase (NADP+ Dependent) 2 Like) is a Protein Coding gene.
Lrfn4	1	0	12.5	37	LRFN4 (Leucine Rich Repeat And Fibronectin Type III Domain Containing 4) is a Protein Coding gene
Esm1	1	0	13.3	34.1	ESM1 (Endothelial Cell Specific Molecule 1) is a Protein Coding gene.
Cib3	1	2.88	4.32	8.31	CIB3 (Calcium And Integrin Binding Family Member 3) is a Protein Coding gene.
Greb1l	1	0	6.43	9.84	GREB1L (GREB1 Like Retinoic Acid Receptor Coactivator) is a Protein Coding gene.
Gpc3	1	0	11.2	17.2	GPC3 (glypican 3) is a protein coding gene.
Srrm4	1	0	3.43	5.28	SRRM4 (Serine/Arginine Repetitive Matrix 4) is a Protein Coding gene.
Chrna4	1	0	4.21	6.26	CHRNA4 (Cholinergic Receptor Nicotinic Alpha 4 Subunit) is a Protein Coding gene.
Il1rn	1	0	5.51	10.1	IL1RN (Interleukin 1 Receptor Antagonist) is a Protein Coding gene.
Ccdc120	1	0	4.03	6.5	CCDC120 (Coiled-Coil Domain Containing 120) is a Protein Coding gene.
Prrg1	1	0	2.67	4.42	PRRG1 (Proline Rich And Gla Domain 1) is a Protein Coding gene.
Asns	1	0	2.33	4	ASNS (Asparagine Synthetase (Glutamine-Hydrolyzing)) is a Protein Coding gene.
Fcrla	1	0	9.26	12.7	FCR1A (Fc receptor-like A) is a protein coding gene.
Chek1	1	0	3.27	4.39	CHEK1 (Checkpoint kinase 1) is a protein coding gene.
Neil2	1	0	15.6	19.8	NEIL2 (Nei Like DNA Glycosylase 2) is a Protein Coding gene.
Mtmr11	1	0	8.66	10.9	MTMR11 (Myotubularin Related Protein 11) is a Protein Coding gene.
Adam11	1	0	1.93	2.48	ADAM11 (ADAM Metallopeptidase Domain 11) is a Protein Coding gene
Gsta1	1	-3.28	0	8.95
Gsta4	1	0	0	2.03
Plscr1	1	0	0	2.03
Soat2	1	0	0	2.03
Fgfr2	1	0	0	1.76
Cyp4a14	1	0	0	6.26
Slc25a27	1	0	0	4.54
Ahnak2	1	0	0	19.9
Krt23	1	0	0	13.4
4930518I15Rik	1	0	0	6.38
Slc2a10	1	0	0	24.3
Gm3776	1	0	0	22.9
1810062G17Rik	1	0	0	4.05
Adamtsl3	1	0	0	21.9
Cyp26a1	1	0	0	3.63
Slc30a8	1	0	0	15.2
Galntl5	1	0	0	6.51
Decr2	1	0	0	1.3
Nipal1	1	0	0	14.2
Zfp28	1	0	0	3.85
Cox17	1	0	0	1.66
Fam13a	1	0	0	3.63
Slc7a2	1	0	0	2.09
Blm	1	0	0	3.48
Hivep3	1	0	0	3.1
Tmem146	1	0	0	3.09
Dock7	1	0	0	1.72
Fam120c	1	0	0	3.07
Prim1	1	0	0	2.27
Casp6	1	0	0	1.59
Sds	1	0	0	2.8
G6pdx	1	0	0	2.19
Robo4	1	0	0	1.8
Cd79b	1	0	0	2.52
Trmt13	1	0	0	2.3
Mug2	1	0	0	1.66
Glt1d1	1	0	0	2.38
Fmo4	1	0	0	1.48
Sorbs3	1	0	0	2.38
Tnrc6a	1	0	0	1.48
Chka	1	0	0	2.3
Ms4a4d	1	0	0	1.94
Lama4	1	0	0	2.3
Cblb	1	0	0	1.94
Ablim1	1	0	0	1.4
Cyp4f15	1	0	0	1.4
Arhgef10l	1	0	0	1.44
Dnttip1	1	0	0	1.65
Dnmbp	1	0	0	1.65
Mtx3	1	0	0	1.67
Plekha6	1	0	0	1.67
Bok	1	0	0	1.67
Crtc2	1	0	0	1.55
Gpat2	1	0	0	1.94
Col4a2	1	0	0	1.77
Zfp395	1	0	0	1.69
Nid1	1	0	0	1.9
Inpp4a	1	0	0	1.77
Lrat	1	0	0	1.74
Eif2ak4	1	0	0	1.74
S100pbp	1	0	0	1.74
Apoa4	1	0	0	4.22
Olfml3	1	0	0	3.19
Id1	1	0	0	7.63
Tlr2	1	0	0	3.7
Lrrc4c	1	0	0	3.21
Tcrg-C1	1	0	0	7.75
Cyp4a31	1	0	0	3.06
Ppargc1a	1	0	0	2.94
Niacr1	1	0	0	12.6
Dbndd2	1	0	0	5.57
Sema5a	1	0	0	5.4
Fgf21	1	0	0	32
Cyp2a4	1	0	0	109
B3gnt8	1	0	0	3.81
Cenpa	1	0	0	2.15
Cilp	1	0	0	34.7
Aebp1	1	0	0	4.82
Sgk2	1	0	0	1.78
Epha4	1	0	0	12.5
Bmf	1	0	0	2.4
Sdsl	1	0	0	2.1
Pdzd9	1	0	0	12
Notch1	1	0	0	2.15
Gm10639	1	0	0	5.54
Cxcl9	1	0	0	3.07
Mpzl1	1	0	0	2.48
Zfp619	1	0	0	3.78
Smad9	1	0	0	3.15
Gdf15	1	0	0	3
Ighd	1	0	0	3
Vldlr	1	0	0	2.95
Grpel2	1	0	0	2.16
Sh2d3c	1	0	0	1.72
Chmp4c	1	0	0	2.7
Gin1	1	0	0	2.16
Mbd6	1	0	0	1.72
Klk1b4	1	0	0	2.5
Brca2	1	0	0	2.16
Elovl2	1	0	0	2.02
Rerg	1	0	0	2.16
Ypel2	1	0	0	1.85
Ulk3	1	0	0	2.11
Slc29a1	1	0	0	1.45
Lpin2	1	0	0	2.11
Hfe2	1	0	0	1.45
4833420G17Rik	1	0	0	1.5
Hdac5	1	0	0	1.5
Agfg2	1	0	0	1.5
Pstk	1	0	0	1.5
Pyroxd2	1	0	0	1.6
Gm10073	1	0	0	1.6
Zfp444	1	0	0	1.6
Rbm20	1	0	0	2
Zfand4	1	0	0	1.92
Tm4sf4	1	0	0	1.81
Klhl3	1	0	0	1.89
Ranbp10	1	0	0	1.7
Cirbp	1	0	0	1.89
Rilp	1	0	0	1.7
Ankrd16	1	0	0	1.89
Maged2	1	0	0	1.7
Srrm2	1	0	0	1.75
Gtf2ird1	1	0	0	1.75
Acer2	1	0	0	1.75
Pdzk1ip1	1	0	0	1.83
Mknk2	1	0	0	1.83
Flcn	1	0	0	1.83
Igfbp3	1	0	0	1.83
Naip2	1	0	0	1.81
Cpeb2	1	0	0	1.81
Scap	1	0	0	1.35
Prss8	1	0	0	1.62
Dcaf6	1	0	0	1.62
Cdc42ep4	1	0	0	1.62
Izumo4	1	0	0	1.62
Setd4	1	0	0	2.06
Fgd6	1	0	0	1.82
Gstm1	1	0	0	2.06
Col5a2	1	0	0	1.85
Slc22a27	1	0	0	5.71
Abcd2	1	0	0	5.47
Rad51	1	0	0	3.18
Dsg1c	1	0	0	2.69
Cdkn1a	1	0	0	2.86
Defb1	1	0	0	2.57
Ccl9	1	0	0	1.48
Abcg5	1	0	0	2.57
Mia3	1	0	0	1.48
Rpl19	1	0	0	1.22
Uroc1	1	0	0	1.27
Atxn2	1	0	0	1.43
Rbpms	1	0	0	1.43
Upp1	1	0	0	2.06
Klhl24	1	0	0	1.42
Cd9	1	0	0	1.57
Tnk2	1	0	0	1.57
Mgst3	1	0	0	1.57
Nrn1	1	0	0	1.57
Lamb1	1	0	0	1.64
Nlrp12	1	0	0	1.64
Foxp1	1	0	0	1.79
Dyrk1b	1	0	0	1.79
Dip2a	1	0	0	1.99
Dntt	1	0	0	4.19
Maff	1	0	0	2.98
Renbp	1	0	0	2.98
Dqx1	1	0	0	2.83
Cyp3a59	1	0	0	1.72
Slco1a4	1	0	0	2.68
Ropn1l	1	0	0	1.7
Stat5b	1	0	0	1.34
Tmem50a	1	0	0	1.34
Spg20	1	0	0	1.49
Lpcat3	1	0	0	1.49
Srsf5	1	0	0	1.49
Amdhd2	1	0	0	1.49
Trp53bp2	1	0	0	1.54
Zfp467	1	0	0	1.54
Akap8l	1	0	0	1.99
Sparc	1	0	0	1.52
Khnyn	1	0	0	1.79
Fads2	1	0	0	1.72
Tbx20	1	0	0	3.08
Art2b	1	0	0	2.66
Ppargc1b	1	0	0	3.08
Gnl2	1	0	0	1.33
Hic2	1	0	0	2.72
Camk1	1	0	0	1.8
Hjurp	1	0	0	1.73
Serpinb8	1	0	0	2.33
Rhobtb1	1	0	0	1.52
Klf9	1	0	0	1.45
Sult1c2	1	0	0	2.2
Tpst2	1	0	0	1.53
Zranb1	1	0	0	1.33
Map3k13	1	0	0	2.2
Agxt	1	0	0	1.53
Gm2a	1	0	0	1.33
Slc12a9	1	0	0	2.2
Igfbp7	1	0	0	1.33
Fam20a	1	0	0	1.54
Erbb3	1	0	0	1.33
Glce	1	0	0	1.69
Phf20	1	0	0	1.68
Nr1i2	1	0	0	1.69
Vegfa	1	0	0	1.68
As3mt	1	0	0	1.69
Mbip	1	0	0	1.68
Pigl	1	0	0	1.7
Zkscan17	1	0	0	1.64
Rhoc	1	0	0	1.88
Sema4c	1	0	0	2.26
Col4a5	1	0	0	2.26
Cyp2j9	1	0	0	2.26
Tgtp1	1	0	0	2.26
Gadd45a	1	0	0	2.89
Ccdc141	1	0	0	2.27
Zfp385b	1	0	0	1.91
Adamts7	1	0	0	2.95
Tmem86a	1	0	0	2.31
Mri1	1	0	0	1.47
Ctsa	1	0	0	1.28
Hsd17b13	1	0	0	1.41
Npc1	1	0	0	1.41
Ocln	1	0	0	2.13
Usp21	1	0	0	1.73
Bnip1	1	0	0	1.63
Bcl2l1	1	0	0	1.63
Gpatch1	1	0	0	1.63
Lrig3	1	0	0	1.63
Dnajc18	1	0	0	1.63
Srd5a3	1	0	0	1.63
Nagk	1	0	0	1.63
Plvap	1	0	0	1.42
Trp53i11	1	0	0	1.91
Gm3839	1	0	0	1.57
Tcp11l2	1	0	0	1.91
Col4a1	1	0	0	1.57
Tmc7	1	0	0	2.05
Rnf144a	1	0	0	1.92
Gabbr2	1	0	0	2.05
Impg2	1	0	0	1.92
Tk1	1	0	0	2.07
Dixdc1	1	0	0	2.07
Frmd4b	1	0	0	2.07
Aldh1b1	1	0	0	2.07
Smad7	1	0	0	2.07
Plagl1	1	0	0	2.28
Stambpl1	1	0	0	2.92
Peli1	1	0	0	1.53
Stk39	1	0	0	2.42
Mecp2	1	0	0	1.47
Upp2	1	0	0	2.28
Rpl13	1	0	0	1.26
Mtpap	1	0	0	1.39
Vps11	1	0	0	1.39
Gpbp1l1	1	0	0	1.39
Rhod	1	0	0	1.46
Sh2d4a	1	0	0	1.96
Plk2	1	0	0	1.92
Fchsd2	1	0	0	1.55
Rhpn2	1	0	0	1.96
Snai2	1	0	0	1.92
Lims2	1	0	0	1.55
Ap4e1	1	0	0	1.96
Emp2	1	0	0	1.92
Dhtkd1	1	0	0	1.55
Mast3	1	0	0	1.96
Mpzl2	1	0	0	1.92
2700097O09Rik	1	0	0	1.55
Rusc2	1	0	0	1.71
Tnfrsf12a	1	0	0	1.71
Cecr2	1	0	0	1.71
Uba52	1	0	0	2.24
Pde4c	1	0	0	2.24
Rpl12	1	0	0	1.37
Abcc2	1	0	0	1.51
Ltbp4	1	0	0	1.51
Gne	1	0	0	1.51
Rpl32	1	0	0	1.51
Zkscan1	1	0	0	1.51
9930021J03Rik	1	0	0	1.51
Baiap2	1	0	0	2.01
Slc43a3	1	0	0	1.52
Pogk	1	0	0	2.01
Il15ra	1	0	0	1.52
Fbxo31	1	0	0	2.14
Sphk2	1	0	0	1.38
F11	1	0	0	1.38
Phc2	1	0	0	1.38
Abcc3	1	0	0	1.56
Clint1	1	0	0	1.32
St7	1	0	0	1.56
Sfxn1	1	0	0	1.32
Fstl1	1	0	0	2.08
Abhd2	1	0	0	2.08
Setdb2	1	0	0	1.61
Zfp275	1	0	0	1.86
Mt1	1	0	0	0
Mt2	1	0	0	0
Drg2	1	0	-1.38	-1.32	DRG2 (Developmentally Regulated GTP Binding Protein 2) is a Protein Coding gene.
Gosr2	1	0	-1.41	-1.34	GOSR2 (Golgi SNAP Receptor Complex Member 2) is a Protein Coding gene.
Arl1	1	0	-1.35	-1.32	ARL1 (ADP Ribosylation Factor Like GTPase 1) is a Protein Coding gene.
Atp6v1h	1	0	-1.37	-1.34	ATP6V1H (V-type proton ATPase subunit H) is a protein coding gene.
Fam149b	1	0	-1.48	-1.44	FAM149A (Family With Sequence Similarity 149 Member A) is a Protein Coding gene.
Mgam	1	0	-1.32	-1.28	MGAM (Maltase-Glucoamylase) is a Protein Coding gene.
Pex19	1	0	-1.35	-1.31	PEX19 (Peroxisomal Biogenesis Factor 19) is a Protein Coding gene.
Sdr42e1	1	0	-1.54	-1.49	SDR42E1 (Short Chain Dehydrogenase/Reductase Family 42E, Member 1) is a Protein Coding gene.
Lifr	1	0	-1.63	-1.57	LIFR (LIF Receptor Subunit Alpha) is a Protein Coding gene.
Yars2	1	0	-1.33	-1.34	YARS2 (Tyrosyl-TRNA Synthetase 2) is a Protein Coding gene.
Ccs	1	0	-1.39	-1.4	CCS (Copper Chaperone For Superoxide Dismutase) is a Protein Coding gene.
Eif4e	1	0	-1.37	-1.37	EIF4E (Eukaryotic Translation Initiation Factor 4E) is a Protein Coding gene.
Smagp	1	0	-1.38	-1.38	SMAGP (Small Cell Adhesion Glycoprotein) is a Protein Coding gene
Arl4d	1	0	-2.07	-2.07	ARL4D (ADP-ribosylation factor 4D) is a protein coding gene
1500003O03Rik	1	0	-1.32	-1.34	1500003O03Rik, AA960066, AI046351, calcineurin-like EF hand protein 1
Ugt2b5	1	0	-1.65	-1.67	UGT2B15 (UDP Glucuronosyltransferase Family 2 Member B15) is a Protein Coding gene.
Ndrg2	1	0	-1.3	-1.29	NDRG2 (NDRG Family Member 2) is a Protein Coding gene.
Mavs	1	0	-1.4	-1.39	MAVS (Mitochondrial Antiviral Signaling Protein) is a Protein Coding gene.
Mmgt1	1	0	-1.5	-1.49	MMGT1 (Membrane Magnesium Transporter 1) is a Protein Coding gene.
Lhfpl2	1	0	-1.67	-1.66	LHFPL2 (LHFPL Tetraspan Subfamily Member 2) is a Protein Coding gene.
Ugdh	1	0	-1.46	-1.44	UGDH (UDP-Glucose 6-Dehydrogenase) is a Protein Coding gene.
Cyb5b	1	0	-1.48	-1.46	CYB5B (Cytochrome B5 Type B) is a Protein Coding gene.
Irs2	1	0	-1.61	-1.58	IRS2 (Insulin Receptor Substrate 2) is a Protein Coding gene.
Akr1c14	1	0	-1.76	-1.73	AKR1C4 (Aldo-Keto Reductase Family 1 Member C4) is a Protein Coding gene.
Uspl1	1	0	-1.32	-1.36	USPL1 (Ubiquitin Specific Peptidase Like 1) is a Protein Coding gene. isopeptidase activity.
Entpd5	1	0	-1.37	-1.42	ENTPD5 (Ectonucleoside Triphosphate Diphosphohydrolase 5 (Inactive))
Odc1	1	0	-1.39	-1.44	ODC1 (Ornithine Decarboxylase 1) is a Protein Coding gene.
Mal2	1	0	-1.58	-1.64	MAL2 (Mal, T Cell Differentiation Protein 2) is a Protein Coding gene.
Kmo	1	0	-1.33	-1.41	KMO (Kynurenine 3-Monooxygenase) is a Protein Coding gene.
Ulk2	1	0	-1.34	-1.42	ULK2 (Unc-51 Like Autophagy Activating Kinase 2) is a Protein Coding gene.
Dnajb4	1	0	-1.57	-1.67	DNAJB4 (DnaJ (Hsp40) homolog, subfamily B, member 4) is a protein-coding gene.
Bod1	1	0	-1.35	-1.42	BOD1 (Biorientation Of Chromosomes In Cell Division 1) is a Protein Coding gene.
Ugt2b35 (UDP glucuronosyltransferase 2 family, polypeptide B35) is a protein coding gene.	1	0	-1.58	-1.65	UGT2B15 (UDP glucuronosyltransferase 2 family, polypeptide B35) is a protein gene.
Abcd3	1	0	-1.52	-1.38	ABCD3 (ATP Binding Cassette Subfamily D Member 3) is a Protein Coding gene.
Sumf1	1	0	-1.49	-1.37	SUMF1 (Sulfatase-modifying factor 1) is protein coding gene.
Proz	1	0	-1.41	-1.29	PROZ (Protein Z) is a protein coding gene.
4931406C07Rik	1	0	-1.72	-1.57	4931406C07Rik is a protein-coding gene in mice
Chchd2	1	0	-1.44	-1.34	CHCHD2 (Coiled-Coil-Helix-Coiled-Coil-Helix Domain Containing 2) is a Protein Coding gene.
Slc17a3	1	0	-1.55	-1.44	SLC17A3 (Solute Carrier Family 17 Member 3) is a Protein Coding gene.
Alas2	1	0	-1.7	-1.58	ALAS2 (5'-Aminolevulinate Synthase 2) is a Protein Coding gene.
Chpt1	1	0	-1.54	-1.44	CHPT1 (Choline Phosphotransferase 1) is a Protein Coding gene.
AI182371	1	0	-1.55	-1.45	AI182371 is a protein coding gene in mice.
Adipor2	1	0	-1.59	-1.42	ADIPOR2 (Adiponectin Receptor 2) is a Protein Coding gene.
Cyp2c29	1	0	-1.66	-1.48	CYP2C19 (Cytochrome P450 Family 2 Subfamily C Member 19) is a Protein Coding gene.
Psmd2	1	0	-1.44	-1.29	PSMD2 (Proteasome 26S Subunit, Non-ATPase 2) is a Protein Coding gene.
Ctrb1	1	0	-35.9	-32.3	CTRB1 (Chymotrypsinogen B1) is a Protein Coding gene.
Fam171a1	1	0	-1.99	-1.74	FAM171A1 (Family With Sequence Similarity 171 Member A1) is a Protein Coding gene.
Srr	1	0	-1.64	-1.39	SRR (Serine Racemase) is a Protein Coding gene.
Tln2	1	0	-2.05	-1.67	TLN2 (Talin 2) is a Protein Coding gene.
Ugt3a1	1	0	-2.56	-1.82	UGT3A1 (UDP Glycosyltransferase Family 3 Member A1) is a Protein Coding gene.
Nudcd3	1	0	-1.34	-1.5	NUDCD3 (NudC domain-containing protein 3) is a protein coding gene.
Sec63	1	0	-1.3	-1.43	SEC63 (SEC63 Homolog, Protein Translocation Regulator) is a Protein Coding gene.
1110059E24Rik	1	0	-1.45	-1.59	1110059E24Rik is a protein coding gene
G6pc	1	0	-2.59	-2.86	G6PC (Glucose-6-Phosphatase Catalytic Subunit) is a Protein Coding gene.
Dnaja1	1	0	-1.41	-1.65	DNAJA1 (DnaJ Heat Shock Protein Family (Hsp40) Member A1) is a Protein Coding gene.
Hsph1	1	0	-1.52	-1.79	HSPH1 (Heat Shock Protein Family H (Hsp110) Member 1) is a Protein Coding gene.
Hsp90aa1	1	0	-1.54	-1.78	HSP90AA1 (heat shock protein 90kDa alpha (cytosolic), class A member 1) is a protein-coding gene.
Coq10b	1	0	-1.5	-1.88	COQ10B (Coenzyme Q10B) is a Protein Coding gene.
Nceh1	1	0	-1.74	-2.13	NCEH1 (neutral cholesterol ester hydrolase 1) is a protein-coding gene.
Plcxd2	1	0	-1.51	-1.98	PLCXD2 (phospholipase C X domain containing 2) is a protein coding gene.
Me1	1	0	-1.4	-1.85	ME1 (malic enzyme 1) is a protein coding gene.
Serpine2	1	0	-2.25	-2.98	SERPINE2 (Serpin Family E Member 2) is a Protein Coding gene.
Dnajb1	1	0	-1.51	-2.06	DNAJB1 (DnaJ Heat Shock Protein Family (Hsp40) Member B1) is a Protein Coding gene.
Cyp51	1	-1.72	-1.79	-1.44	CYP51A1 (Cytochrome P450 Family 51 Subfamily A Member 1) is a Protein Coding gene.
Cd1d1	1	-1.27	-1.59	-1.28	CD1D(cluster of differentiation 1D) is a protein coding gene.
Eif2ak2	1	-1.59	-1.84	-1.62	EIF2AK2 (Eukaryotic Translation Initiation Factor 2 Alpha Kinase 2) is a Protein Coding gene.
Aldh1a1	1	-1.74	-2.01	-1.68	ALDH1A1 (Aldehyde Dehydrogenase 1 Family Member A1) is a Protein Coding gene.
Gde1	1	-1.29	-1.43	-1.39	GDE1 (Glycerophosphodiester Phosphodiesterase 1) is a Protein Coding gene.
Adh4	1	-1.65	-2.05	-1.87	ADH4 (alcohol dehydrogenase 4 (class II), pi polypeptide) is a protein-coding gene.
Akr1c19	1	-1.63	-2.17	-1.97	AKR1C19 (aldo-keto reductase family 1, member C19) ia a protein coding gene.
Sc4mol	1	-2.46	-1.78	-1.57	SC4MOL (sterol-C4-methyl oxidase) is a protein gene.
Hmgcs1	1	-2.3	-1.92	-1.57	HMGCS1 (3-Hydroxy-3-Methylglutaryl-CoA Synthase 1) is a Protein Coding gene.
Idi1	1	-2.79	-2.47	-2.13	IDI1 (Isopentenyl-Diphosphate Delta Isomerase 1) is a Protein Coding gene.
Slc25a25	1	-1.72	-2.42	-3.1	SLC25A25 (Solute Carrier Family 25 Member 25) is a Protein Coding gene.
Rab1	1	0	0	-1.31
Atp6v1a	1	0	0	-1.31
C2cd2	1	0	0	-1.31
Prdx6	1	0	0	-1.31
Narf	1	0	0	-1.32
2810453I06Rik	1	0	0	-1.56
Ubqln1	1	0	0	-1.32
Gtf2e1	1	0	0	-1.56
Psmd13	1	0	0	-1.32
Nudt3	1	0	0	-1.56
Dck	1	0	0	-1.52
Vps37b	1	0	0	-2.48
Alas1	1	0	0	-2.61
Hivep1	1	0	0	-1.68
Ube2s	1	0	0	-1.69
Dio1	1	0	0	-1.64
Irf5	1	0	0	-1.7
Bag3	1	0	0	-2.32
Egfr	1	0	0	-1.66
Atp11a	1	0	0	-2.3
Aggf1	1	0	0	-1.29
Mrpl36	1	0	0	-1.29
Xpo7	1	0	0	-1.34
Gsr	1	0	0	-1.34
Hnrnpab	1	0	0	-1.34
Atf4	1	0	0	-1.34
Fam98a	1	0	0	-1.35
Slc25a45	1	0	0	-1.56
Tmed9	1	0	0	-1.35
Map4k5	1	0	0	-1.56
Mfsd6	1	0	0	-1.37
Ncor2	1	0	0	-1.37
Casp8	1	0	0	-1.37
Slc30a10	1	0	0	-1.37
Whsc1l1	1	0	0	-1.37
Tmem127	1	0	0	-1.37
Mapk1ip1l	1	0	0	-1.37
Cyp8b1	1	0	0	-2.4
Hspa1a	1	0	0	-3.33
Qsox1	1	0	0	-1.62
Mb21d2	1	0	0	-1.62
Crtc3	1	0	0	-1.62
Zfp672	1	0	0	-1.64
Rptor	1	0	0	-1.34
Tmub1	1	0	0	-1.66
Trappc2	1	0	0	-1.59
Cadm4	1	0	0	-1.68
Ube2o	1	0	0	-1.74
Dnajb6	1	0	0	-1.35
Trim7	1	0	0	-1.81
Shpk	1	0	0	-1.3
Gm14403	1	0	0	-1.9
Glrx5	1	0	0	-1.4
Fnbp1l	1	0	0	-1.4
Gjb2	1	0	0	-1.4
Rdh10	1	0	0	-1.4
Akirin2	1	0	0	-1.4
Rbm15b	1	0	0	-1.41
Tacc1	1	0	0	-1.41
G3bp2	1	0	0	-1.41
St3gal4	1	0	0	-1.41
Akirin1	1	0	0	-1.41
Usp39	1	0	0	-1.41
Prkaa2	1	0	0	-1.41
Tbc1d14	1	0	0	-1.44
Sntb1	1	0	0	-1.44
Tlcd2	1	0	0	-1.44
Apon	1	0	0	-1.46
Epb4.1l4b	1	0	0	-1.46
Cmbl	1	0	0	-1.46
Dcun1d1	1	0	0	-1.46
Ube2q2	1	0	0	-1.46
Tmem11	1	0	0	-1.46
Higd1a	1	0	0	-1.51
Wwc2	1	0	0	-1.51
Med19	1	0	0	-1.47
Opn3	1	0	0	-2.81
4930513O06Rik	1	0	0	-22.6
Kbtbd3	1	0	0	-1.6
Lrig1	1	0	0	-1.47
Pik3r1	1	0	0	-1.42
Cyp21a1	1	0	0	-10.7
Cmtm6	1	0	0	-1.66
Hsd3b4	1	0	0	-6.93
Slc34a2	1	0	0	-10.4
Cyp2d40	1	0	0	-1.6
Ccdc25	1	0	0	-1.6
P4ha1	1	0	0	-1.6
Tmem206	1	0	0	-2.81
Inhba	1	0	0	-3.04
Utp23	1	0	0	-1.73
Srgap3	1	0	0	-2.97
Phf8	1	0	0	-1.73
Gm9774	1	0	0	-2.97
Fbxo33	1	0	0	-1.55
Gm20604	1	0	0	-1.9
Vcp	1	0	0	-1.25
Ahcyl1	1	0	0	-1.27
Ppp6r1	1	0	0	-1.27
Ppcs	1	0	0	-1.38
Tpcn1	1	0	0	-1.38
Hspa8	1	0	0	-1.47
Rad23b	1	0	0	-1.33
Rab27b	1	0	0	-4.33
Mmp19	1	0	0	-1.49
Gtpbp4	1	0	0	-1.49
Tubb4b	1	0	0	-1.49
Prr16	1	0	0	-1.49
2610027L16Rik	1	0	0	-1.49
E130309D02Rik	1	0	0	-1.5
Mphosph10	1	0	0	-1.5
Hccs	1	0	0	-1.5
Ern1	1	0	0	-1.5
Kpna2	1	0	0	-1.5
Scoc	1	0	0	-1.5
Pum1	1	0	0	-1.5
Arhgap21	1	0	0	-1.57
Paqr9	1	0	0	-1.54
Tspan14	1	0	0	-1.57
Metrn	1	0	0	-26.5
Srp19	1	0	0	-1.33
Dlec1	1	0	0	-14.1
Nckap5	1	0	0	-23.8
Zbtb8os	1	0	0	-1.59
Tmem19	1	0	0	-1.59
Mpped2	1	0	0	-17
Mad2l1bp	1	0	0	-2.1
Gna14	1	0	0	-2.4
Pcdhb11	1	0	0	-14.8
Rcan2	1	0	0	-2.4
D0H4S114	1	0	0	-4.47
Pfkfb3	1	0	0	-2.76
Hcn3	1	0	0	-3.4
Slc35e3	1	0	0	-1.75
Cbll1	1	0	0	-1.59
Lig4	1	0	0	-1.83
Mis12	1	0	0	-1.48
L3mbtl2	1	0	0	-1.85
Chchd10	1	0	0	-1.48
Sac3d1	1	0	0	-1.85
Wdr37	1	0	0	-1.53
Acot11	1	0	0	-2.25
Pigs	1	0	0	-1.59
Kifc3	1	0	0	-1.77
Ppp1r10	1	0	0	-2.23
Pdgfc	1	0	0	-2
Stxbp6	1	0	0	-1.56
Crybg3	1	0	0	-2.04
Foxk2	1	0	0	-1.42
Zfand2a	1	0	0	-1.97
Rasal2	1	0	0	-2.06
Mfn2	1	0	0	-1.42
Ddc	1	0	0	-2.21
Rbm47	1	0	0	-1.42
Cycs	1	0	0	-1.63
4833439L19Rik	1	0	0	-1.36
Cacybp	1	0	0	-1.36
Zfp445	1	0	0	-1.36
Ywhag	1	0	0	-1.36
Tmem251	1	0	0	-1.56
Ptges3	1	0	0	-1.45
1700017B05Rik	1	0	0	-2.35
Tex14	1	0	0	-11.8
Pax9	1	0	0	-5.83
Cdx4	1	0	0	-16.9
Tmx4	1	0	0	-1.66
Aacs	1	0	0	-3.52
Rfng	1	0	0	-1.63
Lrrc20	1	0	0	-1.65
Prpf6	1	0	0	-1.66
Nrp1	1	0	0	-1.76
Ncald	1	0	0	-1.81
Vmn2r20	1	0	0	-2.27
2310047B19Rik	1	0	0	-1.88
Tppp	1	0	0	-1.88
Kdm5b	1	0	0	-1.52
Tmem189	1	0	0	-2.05
Crem	1	0	0	-1.52
Ugt2b37	1	0	0	-2.05
Yipf6	1	0	0	-1.39
Cdv3	1	0	0	-1.39
Mcfd2	1	0	0	-1.39
Phf20l1	1	0	0	-1.39
Rai14	1	0	0	-1.39
Pdia3	1	0	0	-1.39
Zfp180	1	0	0	-1.39
Ddx54	1	0	0	-1.61
Col4a3	1	0	0	-4.28
Amd1	1	0	0	-2.09
Hspa1b	1	0	0	-3.92
F2r	1	0	0	-1.61
Tmem18	1	0	0	-1.61
Slc22a7	1	0	0	-2.52
Pdzrn3	1	0	0	-2.88
Tmem109	1	0	0	-1.55
Ccdc117	1	0	0	-1.65
Tsr1	1	0	0	-1.55
Jam2	1	0	0	-1.65
Tuba1c	1	0	0	-2.14
Orc2	1	0	0	-1.92
Mvd	1	0	0	-2.05
Zfp790	1	0	0	-1.71
Tek	1	0	0	-1.71
Chic1	1	0	0	-1.7
Gm10053	1	0	0	-1.89
Jmjd6	1	0	0	-1.7
AI464131	1	0	0	-1.89
Acox3	1	0	0	-1.52
Onecut2	1	0	0	-1.87
Nudt7	1	0	0	-1.89
Tmem41b	1	0	0	-1.33
AI480653	1	0	0	-2.2
Dhx9	1	0	0	-1.52
Tgm1	1	0	0	-2.33
St6galnac6	1	0	0	-1.53
Hist2h3c2	1	0	0	-2.58
Smo	1	0	0	-1.79
Susd4	1	0	0	-2.22
Capza1	1	0	0	-1.59
Col13a1	1	0	0	-1.99
Rcan1	1	-1.47	0	-1.98
Pik3r3	1	-1.88	0	-2.42
Lonrf1	1	-1.98	0	-2.57
Srms	1	-2.26	0	-3.45
Snca	1	-3.48	0	-8.06
Cd163	1	0	1.75	-1.76
Pde4b	1	0	1.87	-1.77
Atg16l1	1	-1.26	0	-1.32
Trnau1ap	1	-1.35	0	-1.41
Mocos	1	-1.31	0	-1.32
Zfp809	1	-1.73	0	-1.77
Antxr2	1	-1.43	0	-1.41
9130409I23Rik	1	-1.83	0	-1.77
Ddx19b	1	-1.4	0	-1.57
Nrip1	1	-1.66	0	-1.85
Mcm4	1	-1.74	0	-1.91
Slc46a3	1	-1.51	0	-1.81
Ppp1r1b	1	-2	0	-1.76
Cyp7a1	1	-3.35	0	-2.73
Btbd19	1	-7.77	0	-3.35
Xlr4a	1	-13.8	0	-6.48
